# Supplementary material
Source: PubMed Central journal article supplement (PMC3177140)
Supplement: NIHMS325121-supplement-Supplementary_Data.pdf [file NIHMS325121-supplement-Supplementary_Data.pdf]

## Materials and Methods

### Materials

Reagents were obtained from the following sources: antibodies to phospho-S2481 mTOR, phospho-T389 S6K1, phospho-S235/S236 S6, phospho-T37/T46 4E-BP1, phospho-S65 4E-BP1, phospho-T308 Akt, phospho-S473 Akt, phospho-T246 PRAS40, phospho-T346 NDRG1, phospho-S302 IRS1, phospho-S636/S639 IRS1, phospho-T202/T204 Erk1/2, phospho-tyrosine, phospho-Y1135/1136 IGF1-Rb/phospho-Y1150/Y1151 InRb, phospho-Y1131 IGF-1Rb/phospho-Y1146 InRb, phospho-Y980 IGF-1Rb, phospho-S150 Grb10, phospho-S428 Grb10, phospho-S476 Grb10, Akt, S6K1, 4E-BP1, TSC2, FLAG, rictor, IRS1, IRS2, Nedd4, Erk1/2, IGF-1R, InR, p85 PI3K, and human Grb10 from Cell Signaling Technology; an antibody to mouse Grb10 and HRP-labeled anti-mouse and anti-rabbit secondary antibodies from Santa Cruz Biotechnology; an antibody to IRS1 from Upstate/Millipore; FLAG M2 affinity gel, ATP, staurosporine, cycloheximide, FKBP12, L-glutathione, amino acids, insulin, IGF-1, EGF, and PDGFbb from Sigma-Aldrich; CIP from New England Biolabs, MG-132 from Calbiochem; [ $\gamma$ - $^{32}$ P]ATP and [ $^{35}$ S]cysteine and methionine from Perkin-Elmer; FuGENE 6, PhosSTOP, and Complete Protease Cocktail from Roche; rapamycin from LC Laboratories, PF-4708671 from Tocris Biosciences, DMEM from SAFC Biosciences; Inactivated Fetal Calf Serum (IFS), MagicMedia E. coli expression medium and SimplyBlue Coomassie G from Invitrogen, amino acid-free RPMI from US Biological, Superose 6 10/300 GL and HiLoad 16/60 Superdex 200 from GE Healthcare; BCA assay reagent, protein G-sepharose and immobilized glutathione beads from Pierce; Ni-NTA agarose from Qiagen; Whatman grade P81 ion exchange chromatography paper from Fisher Scientific, QuikChange XLII mutagenesis kit and BL21(DE3) Competent Cells from Stratagene. Torin1 was provided by Nathanael Gray (Harvard Medical School) (1).

### Cell lines and tissue culture

All cells (HEK-293E, HEK-293T, HeLa, MEFs) were cultured in DMEM with 10% IFS and antibiotics. HEK-293Es were generously provided by John Blenis (Harvard Medical School), TSC2<sup>+/+</sup> p53<sup>-/-</sup> and TSC2<sup>-/-</sup> p53<sup>-/-</sup> MEFs by David Kwiatkowski (Harvard Medical School), S6K1<sup>+/+</sup> S6K2<sup>+/+</sup> and S6K1<sup>-/-</sup> S6K2<sup>-/-</sup> MEFs by Mario Pende (INSERM U845, Medical School, Paris Descartes University). rictor<sup>+/+</sup> p53<sup>-/-</sup> and rictor<sup>-/-</sup> p53<sup>-/-</sup> MEFs have been described previously (2). Stable expression cell lines were created using constructs described below according to established procedures (3).

## Quantitative mass spectrometry

*Cell lysis and protein digestion:* Actively proliferating HEK-293E cells were serum starved for 4 hrs, treated with 100 nM rapamycin, 250 nM Torin1, or DMSO for 1 hr, stimulated with 150 nM insulin for 20 minutes, and then lysed. Actively proliferating MEFs in fresh media were treated with 100 nM Torin1 or DMSO for 1 hr and then lysed. Cells were lysed with 8 M urea, 20 mM HEPES pH 8.0, 1 mM sodium orthovanadate, 2.5 mM pyrophosphate, and 1 mM glycerophosphate. Protein concentration was determined using the BCA assay. Proteins were reduced with 10 mM dithiothreitol for 30 min at 56°C, then alkylated with 55 mM iodoacetamide for 1 hr at room temperature in the dark. Cell lysates were diluted to a final urea concentration of 1.6 M with 50 mM ammonium bicarbonate, and digested with trypsin (substrate:enzyme = 50) at 37°C overnight with end-over-end rotation. The resulting peptide solutions were acidified with 10% TFA, and desalted on a Waters C18 solid phase extraction plate. Eluted peptides were divided into ~100ug aliquots, lyophilized to complete dryness, and stored at -80°C until needed.

*iTRAQ labeling:* For both samples, duplicates were performed such that peptides were independently labeled and analyzed by LC-MS/MS twice. Desalted peptides were labeled with iTRAQ (4) reagents according to the manufacturer's instructions (400µg or 800ug in total for 4plex or 8plex, respectively). Briefly, 100 µg aliquots of dried peptides were reconstituted with 30 µL 0.5 M triethylammonium bicarbonate. One tube of iTRAQ reagent (114, 115, 116, or 117 for 4plex; 113, 114, 115, 116, 117, 118, 119, or 121 for 8plex) was reconstituted with 70 µL ethanol (4plex) or 50 µl of isopropanol (8plex), and added to each peptide solution. The reaction was allowed to proceed for 1 hr (4plex) or 2 hr (8plex) at room temperature. Derivatized peptides were combined, dried by vacuum centrifugation, and desalted on a Waters C18 solid phase extraction plate. iTRAQ labeled peptides were lyophilized to complete dryness and stored at -80°C until needed. The MEF samples were labeled with iTRAQ 4plex reagent (TSC2<sup>+/+</sup> Vehicle: 114; TSC2<sup>+/+</sup> Torin1: 115; TSC2<sup>-/-</sup> Vehicle: 116; TSC2<sup>-/-</sup> Torin1: 117). The HEK-293E samples were labeled with iTRAQ 8plex (Starved: 113; Insulin: 114; Torin: 117 or 115 for the first and second replicates, respectively; Rapamycin: 118) with the remaining channels used for other analyses not discussed here.

*Phosphopeptide enrichment:* Magnetic Ni-NTA agarose beads (100 µL of a 5% bead suspension/400 µg tryptic peptides) were treated with 400 µL of 100 mM EDTA, pH 8.0 to remove Ni(II). NTA-agarose beads were then charged with 200 µL of 100 mM aqueous FeCl<sub>3</sub> solution (5). Beads were washed 4x with 400 µL 80% acetonitrile/0.1% TFA to remove excess

metal ions. iTRAQ labeled peptides were reconstituted with 80% MeCN/0.1% TFA at a concentration of 1-2  $\mu\text{g}/\mu\text{L}$ , were then mixed with the beads. The mixture was incubated for 30 min at room temperature with end-over-end rotation. After removing the supernatant, beads were washed 3x with 400  $\mu\text{L}$  80% acetonitrile/0.1% TFA, and 1x with 400  $\mu\text{L}$  of 0.01% acetic acid. Phosphopeptides were eluted with 50  $\mu\text{L}$  of 20 mM ammonium formate buffer pH 10.

*LC-MS/MS analysis:* Enriched phosphopeptides were separated into 40 fractions by high-pH reversed phase and strong anion exchange chromatography, respectively, followed by low-pH reversed phase LC-MS/MS on a QSTAR Elite (AB Sciex, Foster City, CA) hybrid quadrupole time-of-flight mass spectrometer. The spectrometer was operated in data-dependent mode with dynamic exclusion. A precursor was selected for MS/MS when its signal intensity was at least 50 counts, and its charge state is 2+, 3+ or 4+. Up to 5 most abundant precursors in each MS scan could be selected for MS/MS, and then excluded for 20 sec. The MS/MS scan was acquired for 0.5 sec with a multiplier value of 4.

*Data processing:* MS/MS spectra from each acquisition were extracted and converted into .mgf files, and then searched against NCBI mouse and human RefSeq databases (downloaded June 2008) using Mascot. Precursor and product ion tolerances were set at 200 ppm and 0.2 Da respectively. Search parameters included trypsin specificity with up to 2 missed cleavages, fixed carbamidomethylation on cysteine, fixed iTRAQ modification on N-terminus and lysine (8plex for HEK-293E, 4plex for MEF), variable deamidation on asparagine and glutamine, variable oxidation on methionine and variable phosphorylation on serine, threonine and tyrosine. The search results were further collated using our Multiplierz software framework (6, 7) for peptides above a mascot score cutoff of 25, corresponding to a FDR of ~1%. iTRAQ reporter ion intensities were extracted and corrected for isotope impurities. Results from multiple fractions were combined for each sample. iTRAQ reporter ion signals were summed for each unique phosphopeptide. A small aliquot from the supernatant of phosphopeptide enrichment was also analyzed for each sample. The intensity values of iTRAQ reporter ion were summed for each channel across all identified peptides and used to correct for minor variation in source protein amount in each labeled sample.

*Hit identification:* The following  $\log_2(\text{ratios})$  were calculated based on the corrected ion intensities: (Starved/Insulin), (Rapamycin/Insulin), (Torin1/Insulin) for HEK-293E samples and (TSC2<sup>+/+</sup> Torin1/ TSC2<sup>+/+</sup> vehicle), (TSC2<sup>-/-</sup> vehicle/ TSC2<sup>+/+</sup> vehicle), and (TSC2<sup>-/-</sup> Torin1/ TSC2<sup>-/-</sup>

<sup>-/-</sup> vehicle) for the MEF samples. The binary logarithms were then median centered and median absolute deviation (MAD) scaled separately for each technical replicate. The mTOR-regulated phosphopeptides (“hits”) were those with a robust z-score (MADs away from the median) of at least -2.5 in  $\log_2(\text{Torin1/Insulin})$  for HEK-293E or  $\log_2(\text{TSC2}^{-/-} \text{ Torin1/ TSC2}^{-/-} \text{ vehicle})$  for MEF. Those phosphopeptides detected in both replicates had to score below the threshold both times in order to be counted among the regulated phosphopeptides. The phosphopeptides which qualified as “rapamycin-sensitive” or “TSC2-upregulated” were those whose  $\log_2(\text{Rapamycin/Insulin})$  or  $(\text{TSC2}^{-/-} \text{ vehicle/ TSC2}^{+/+} \text{ vehicle})$  met the -2.5 MAD or +2.5 MAD cutoffs, respectively. Enrichment of control peptides was determined using Fisher’s Exact Test and a list of well-accepted mTOR pathway phosphorylation sites which were detected in the datasets (Table S1). Correlation of features was measured using Spearman’s rank correlation coefficient and significance was tested using a p test. p-values  $\sim 0$  are lower than the smallest number able to be represented computationally.

*Heat map visualization:* The HEK-293E mTOR-regulated phosphopeptides were sorted based on their  $\log_2(\text{Rapamycin/Insulin})$  robust z-score and negative outliers were set to -10 in the heatmap for improved visualization. Conditions were clustered using complete-linkage hierarchical clustering with the Euclidian distance metric. Statistical analyses and data processing were performed in R 2.11.1 and Bioperl 1.6 (8).

*Pathway analysis:* Enrichment was determined at the protein level by collapsing the mTOR-regulated phosphopeptides at the -2 MAD cutoff from both datasets into gene symbols. Analysis was performed using DAVID (9, 10), and SP\_PIR\_KEYWORDS, the GO FAT categories, Interpro domains, and Biocarta and KEGG pathways. Terms were defined as enriched if they contained at least 2 hits from the screen and had p-values  $< 0.01$  and a FDR  $< 10\%$ .

### **Positional scanning peptide library screening**

*PSPL screening:* mTORC1 purification from HEK-293T cells stably expressing FLAG-raptor and Rheb purification from transiently transfected HEK-293T cells were performed as described previously (11, 12). PSPL screening was done according to the published protocol (13) with the final reaction conditions as follows: 20 mM HEPES, pH 7.4, 10 mM  $\text{MgCl}_2$ , 4 mM  $\text{MnCl}_2$ , 1 mM DTT, 50 ng Rheb, 150 ng mTORC1, 50  $\mu\text{M}$  biotinylated peptides, 50  $\mu\text{M}$  ATP, 2  $\mu\text{Ci}$   $[\gamma\text{-}^{32}\text{P}]\text{ATP}$ . Each reaction consists of purified mTORC1, Rheb, radiolabeled ATP, and a mixture of peptides

containing one fixed residue relative to the central phospho-acceptor and other residues randomized. After incubating for 6 hrs at 30°C, aliquots of the reactions were spotted onto streptavidin membrane and analyzed by PhosphorImaging.

*Data analysis:* A position specific scoring matrix (PSSM) was generated based on the normalized average intensities of the spots in the PSPL plot. A PSSM entry  $S_{ij}$  for residue  $i$  in position  $j$  was calculated using the formula

$$S_{ij} = (I_{ij} - \bar{I}_j) \frac{s_{ij}}{\bar{I}_j}$$

where  $I_{ij}$  is the normalized average intensity of the spot for residue  $i$  in position  $j$ ,  $\bar{I}_j$  is the mean of the average normalized intensities in position  $j$ , and  $s_{ij}$  is the standard deviation of the average normalized intensities in position  $j$ . The exponential of the PSSM ( $e^{S_{ij}}$ ) was used as input for the Scansite algorithm to predict likely mTOR phospho-acceptor sites (14). Confidence thresholds for predictions were set based on the 0.2<sup>nd</sup>, 1.5<sup>th</sup>, and 5<sup>th</sup> percentile of the empiric score distributions of all serine and threonine sites in NCBI human and mouse RefSeq databases (downloaded June 2008). This setting corresponds to high, medium, and low stringency, respectively, in the standard Scansite configuration. For the classification of the mTOR-regulated phosphopeptides, those phosphopeptides containing sites whose Scansite scores were below the 5<sup>th</sup> percentile were considered as possessing a putative mTOR motif. AGC kinase motifs were determined by querying the sites for an (R/K)X(R/K)XX(S\*/T\*) sequence.

### **cDNA manipulations and mutagenesis**

The cDNA for human GRB10 (NCBI NM\_001001550.2 isoform c) in the pOTB7 vector was obtained from OpenBiosystems. The GRB10 cDNA was amplified by PCR, and the product was subcloned into the XhoI and NotI sites of the pMSCV retroviral vector for stable expression or the XbaI and XhoI sites of pET303/CT-His vectors for bacterial expression. The HA-GST-S6K1-pRK5 and GST-4E-BP1-pGEX-4T constructs were described previously (12, 15).

The Grb10-pMSCV and HA-GST-S6K1-pRK5 were mutagenized with the QuikChange XLII mutagenesis kit with oligonucleotides obtained from Integrated DNA Technologies. The Grb10 mutants used in our experiments are (amino acid numbering according to NCBI NM\_005311.4 isoform a although all clones used in this study are the human isoform c): 5A = S150A T155A S158A S474A S476A Grb10, 9A = S104A S150A T155A S158A S426A S428A

S431A S474A S476A, 2D = S474D S476, and 5D = S150D T155D S158D S474D S476D. T229 of S6K1 in the HA-GST-pRK5 vector was mutated to an alanine to attenuate its catalytic activity.

### **Cell treatments, lysis, immunoprecipitations, and phosphatase treatment**

For growth factor stimulation, almost confluent cells were rinsed once and incubated in serum-free DMEM for times as indicated in figure legends, and then stimulated for 15 or 20 minutes. Inhibitors and doses of growth factors were added as indicated. Insulin and IGF-1 were most commonly used at 100 or 150 nM and 100 ng/ml, respectively. Amino acid starvation was done as described previously (16).

Cells rinsed once with ice-cold PBS and lysed in ice-cold lysis buffer (50 mM HEPES [pH 7.4], 40 mM NaCl, 2 mM EDTA, 1 mM orthovanadate, 50 mM NaF, 10 mM pyrophosphate, 10 mM glycerophosphate, and 1% Triton X-100 or 0.3% CHAPS (for immunoprecipitations), and one tablet of EDTA-free protease inhibitors per 25ml. The soluble fractions of cell lysates were isolated by centrifugation at 13,000 rpm for 10 minutes by centrifugation in a microfuge. For immunoprecipitations, one PhosSTOP tablet was added per 25 ml of CHAPS lysis buffer, and primary antibodies were added and the lysates incubated with rotation overnight at 4°C. 50% slurry of protein G-sepharose was then added and the incubation continued for an additional 1 hour. Immunoprecipitates were washed three times with lysis buffer containing 150 mM NaCl. Immunoprecipitated proteins were denatured by the addition of sample buffer, boiled for 5 minutes, resolved by SDS-PAGE, and analyzed by immunoblotting as previously described (17).

For FLAG purification, FLAG M2 affinity resins were washed 2 times in lysis buffer, added to pre-cleared lysates, and incubated with rotation for 2 hours at 4°C. FLAG-Grb10 purified from a 10 cm plate of insulin stimulated TSC2<sup>+/+</sup> MEFs stably expressing FLAG-Grb10 was phosphatase treated while still bound to FLAG resin. The resin-bound FLAG-Grb10 washed once in 1X NEBuffer 3, divided among the reaction tubes, and incubated for 60 minutes at 37°C in 20 µl of buffer alone, buffer with 20 units of CIP, or 20 units of CIP previously inactivated by boiling for 10 minutes. FLAG-Grb10 from serum starved or Torin1-treated cells was incubated for 60 minutes at 37°C in buffer alone. The reactions were stopped with the addition of sample buffer, boiled, and analyzed by immunoblotting.

### **mTORC1 kinase assays**

HA-GST-S6K1 (T229A) was purified from transiently transfected HEK-293T cells treated with 250 nM Torin1 for one hour and lysed in Triton lysis buffer. The cleared lysates were incubated with glutathione resin for 2 hours at 4°C, eluted as described previously (12), concentrated, quantified, and stored in 50% glycerol at -20°C. BL21(DE3) cells carrying GST-4E-BP1-pGEX-4T were grown in MagicMedia for 24 hours, and lysed by sonication in ice-cold Triton lysis. GST-4E-BP1 purification proceeded as detailed for HA-GST-S6K1, but was further purified by gel filtration using a HiLoad 16/60 Superdex 200 column and stored at -80°C. BL21 (DE3) cells carrying pET303-Grb10 were grown in MagicMedia for 24 hours, and lysed by sonication in ice-cold His-tag lysis buffer (25 mM Hepes [pH 7.4], 500 mM NaCl, 5 mM Imidazole, 1% Triton + protease inhibitor tablets). The cleared lysate was incubated with Ni-NTA agarose, incubated for 20 minutes at 4°C, washed, eluted in 150 mM imidazole-containing buffer, and further purified by gel filtration using a HiLoad 16/60 Superdex 200 column and stored at -80°C.

mTORC1 was purified from HEK-293T cells stably-expressing FLAG-raptor as described (11). Kinase assays were preincubated for 10 minutes at 4°C before addition of ATP, and then for 30 minutes at 30°C in a final volume of 20 µl consisting of: kinase buffer (25 mM HEPES, pH 7.4, 50 mM KCl, 10 mM MgCl<sub>2</sub>, 1 µM staurosporine), active mTORC1, 500 nM substrate, 50 µM ATP, 2 µCi [ $\gamma$ -<sup>32</sup>P]ATP, and when indicated 250 nM Torin1 or 250 nM rapamycin/FKBP12. Samples were stopped by the addition of 10 µl of sample buffer, boiled for 5 minutes, and analyzed by SDS-PAGE followed by autoradiography.

### **Grb10 phosphorylation site mapping**

mTORC1 kinase assays were performed as detailed above, except with a one hour reaction time and in the presence of 500 µM cold ATP. For the *in vitro* kinase assay samples, urea was added to a final concentration of 1.6 M. Proteins were reduced with 10 mM DTT at 56°C for 30 min, alkylated with 55 mM iodoacetamide for 1 hr at room temperature in the dark, then digested with trypsin at 37°C overnight. The solution was then acidified with 10% TFA. Peptides were extracted using c18 ZipTip, were lyophilized to dryness, and were stored at -80°C until needed. A third of each sample was analyzed by LC/MS/MS on an orbitrap velos mass spectrometer in data-dependent mode. Identified phosphopeptides were manually validated and combined into a single list. A targeted MS method was then created to perform MS/MS on those selected phosphopeptides, as well as the top 5 most abundant precursors in each cycle. The *in vitro* kinase samples were then re-analyzed with the targeted MS method.

Peak intensity values of extract ion chromatogram were obtained for both the phosphorylated and unphosphorylated forms. Their ratios were used to compare the phosphorylation level in different samples. FLAG-Grb10 immunoprecipitates from HEK-293E cells stably expressing Grb10 were separated on SDS-PAGE and stained with Coomassie. The bands corresponding to Grb10 were excised and digested in situ. Peptides were extracted and analyzed using the targeted MS method. Phosphorylation levels on identified phosphopeptides were estimated as described above. p-values were determined by a one-tailed Mann-Whitney t-test.

### **Antibody detection of Grb10**

The human Grb10 antibody (CST) detects one isoform of Grb10 while the mouse Grb10 antibody detects multiple isoforms (Santa Cruz). Phosphospecific antibodies against S150, S428, and S476 of Grb10 were provided as bleeds from Cell Signaling Technology. All could be used to detect the phosphorylation of immunoprecipitated human Grb10, and the antibodies against S150 and S476 could also be used to probe mouse lysates.

### **Lentiviral shRNAs**

TRC lentiviral shRNAs (18) targeting Grb10 and Nedd4 were obtained from the RNAi consortium (Broad Institute of MIT and Harvard) (18). The TRC identifications for each shRNA are as follows:

Human GRB10 shRNA #1: TRCN0000063686; NM\_001001549.1-1459s1c1

Mouse Grb10 shRNA #1: TRCN0000109915; NM\_010345.2-2392s1c1

Mouse Grb10 shRNA #2: TRCN0000109917; NM\_010345.2-1841s1c1

Mouse Nedd4 shRNA #1: TRCN000009235; XM\_486230.1-1319s1c1

Mouse Nedd4 shRNA #2: TRCN000009236; XM\_486230.1-2082s1c1

The shGFP control and the shRNA targeting mouse raptor were previously described and validated (1, 19). The mouse Grb10 shRNA #1 was also additionally cloned into a pLKO.1 derivative, pLKO\_TRC016, obtained from the RNAi consortium (Broad Institute of MIT and Harvard) with a blasticidin resistance gene. Virus production was performed as previously described (19). Virus-containing supernatants were collected 48 hours after transfection, filtered to eliminate cells, and target cells were infected in the presence of 8 µg/ml polybrene. 24 hours later, cells were selected with puromycin or blasticidin and analyzed starting at the 3<sup>rd</sup> day after infection. Grb10 knockdown cells were passaged with persistent antibiotic selection.



For replacement of endogenous murine Grb10 with human Grb10 isoform c, TSC2<sup>-/-</sup> p53<sup>-/-</sup> MEFs were infected with retroviruses (pMSCV) expressing empty vector, FLAG-Grb10, FLAG-Grb10 5A, or FLAG-Grb10 9A mutants, and selected for 4 days in puromycin. The resulting stable cell lines were subsequently infected with lentiviruses expressing either the control hairpin or mouse Grb10 shRNA #1 in pLKO\_TRC016 that recognizes the 3' untranslated region of the mouse Grb10 mRNA, but not the human cDNA. Cells were then kept in puromycin and additionally selected in blasticidin, and analyzed starting at the 7<sup>th</sup> day after lentiviral infection. Grb10 replacement cells were passaged with persistent dual antibiotic selection.

### **Pulse chase**

Cells were labeled with 1 mCi [<sup>35</sup>S]methionine/cysteine (1175 Ci/mmol) in 15 ml methionine- and cysteine-free DMEM at 37°C for 2 hours and chased with DMEM and 10% IFS supplemented with nonradiolabeled methionine (2.5 mM) and cysteine (0.5 mM) at 37 °C for the indicated times. mTOR inhibitors were added to the chase as indicated. Cells were lysed in 1% SDS in PBS. Immunoprecipitations were performed in Nonidet P-40 lysis buffer (50 mM Tris [pH 7.5], 150 mM NaCl, 5 mM EDTA, 0.5% NP-40, and protease inhibitors) with 0.1% SDS and 30 µl of anti-FLAG M2-agarose for 3 hr at 4°C. Immunoprecipitates were boiled in sample buffer, subjected to 10% SDS-PAGE, and visualized by autoradiography or quantified by PhosphorImaging. p-values were determined by a two-way ANOVA.

### **Grb10 mRNA expression analysis**

For quantification of Grb10 mRNA expression, total RNA was isolated from cells grown in the indicated conditions and reverse-transcription was performed. The resulting cDNA was diluted in DNase-free water (1:100) before quantification by real-time PCR. Data are expressed as the ratio between the expression of Grb10 and the housekeeping gene Rplp0. p-values were determined by a two-tailed Mann-Whitney t-test.

The following primers were used for quantitative real-time PCR:

Grb10 (*M. musculus*):

Forward: ACAGGATCATCAAGCAACAA

Reverse: TCTTTGTGAAGTCCAATAAC

Rplp0 (*M. musculus*):

Forward: TAAAGACTGGAGACAAGGTG

Reverse: GTGTACTCAGTCTCCACAGA

## FIGURE S1

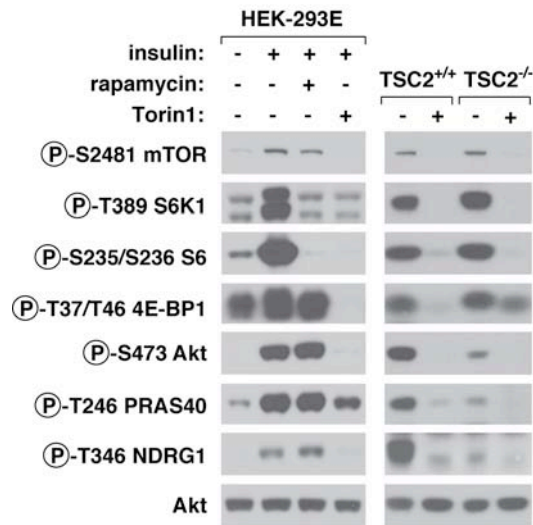

**Fig. S1.** Known mTOR pathway phosphorylations in HEK-293E cells serum starved for 4 hrs, treated with 100 nM rapamycin, 250 nM Torin1 or vehicle control for 1 hr, and then stimulated where indicated with 150 nM insulin for 20 min or TSC2<sup>+/+</sup> and TSC2<sup>-/-</sup> MEFs treated with 100 nM Torin1 or vehicle control for 1 hr behaved as expected. Cell lysates were analyzed by immunoblotting for the levels and phosphorylation states of the specified proteins.

## FIGURE S2

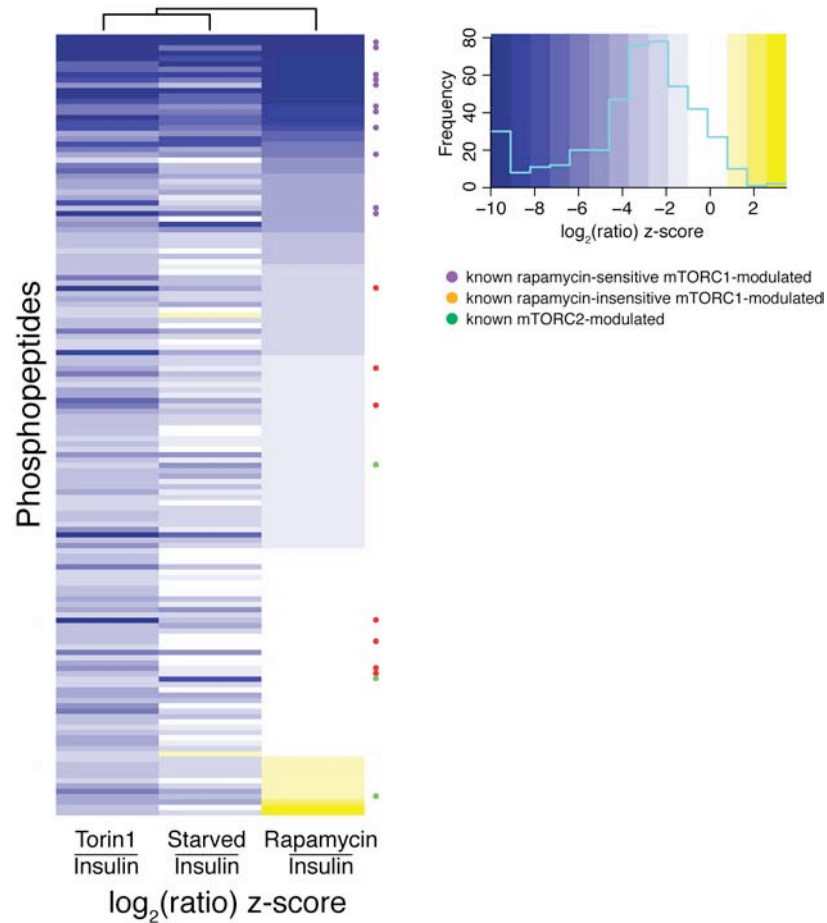

**Fig. S2.** Heat map visualization of the robust z-scores for the HEK-293E mTOR-regulated phosphopeptides reveals the similarity between serum starvation and Torin1 treatment, the ability to differentiate rapamycin-sensitive from -insensitive sites, and the greater extent of inhibition of rapamycin-sensitive phosphorylation sites with Torin1. Conditions were hierarchically clustered while phosphopeptides were sorted based on rapamycin-sensitivity. Yellow indicates positive z-scores, and blue indicates negative z-scores. Those z-scores less than -10 were binned together to aid in visualization. Known mTOR-modulated sites are indicated.

## FIGURE S3

|                  | Gene symbol | Protein | Site | -5 | -4 | -3 | -2 | -1 | Ⓟ | 1 | 2 | 3 | 4 | + |  |
|------------------|-------------|---------|------|----|----|----|----|----|---|---|---|---|---|---|--|
| Proline-directed | EIF4EBP1    | 4E-BP1  | T37  | G  | D  | Y  | S  | T  | T | P | G | G | T |   |  |
|                  |             |         | T46  | T  | L  | F  | S  | T  | T | P | G | G | T |   |  |
|                  |             |         | S65  | M  | E  | C  | R  | N  | S | P | V | T | K |   |  |
|                  |             |         | T70  | S  | P  | V  | T  | K  | T | P | P | R | D |   |  |
| Hydrophobic      | RPS6KB1     | S6K1    | T389 | V  | F  | L  | G  | F  | T | Y | V | A | P |   |  |
|                  | AKT1        | AKT1    | S473 | H  | F  | P  | Q  | F  | S | Y | S | A | S |   |  |
|                  | SGK1        | SGK1    | S422 | A  | F  | L  | G  | F  | S | Y | A | P | P |   |  |

**Fig. S3.** mTOR phosphorylates two distinct motifs: proline-directed sites present in substrates like 4E-BP1 and the hydrophobic motif present in AGC family kinases. The numbering of the positions is relative to the central phospho-acceptor serine or threonine.

## FIGURE S4

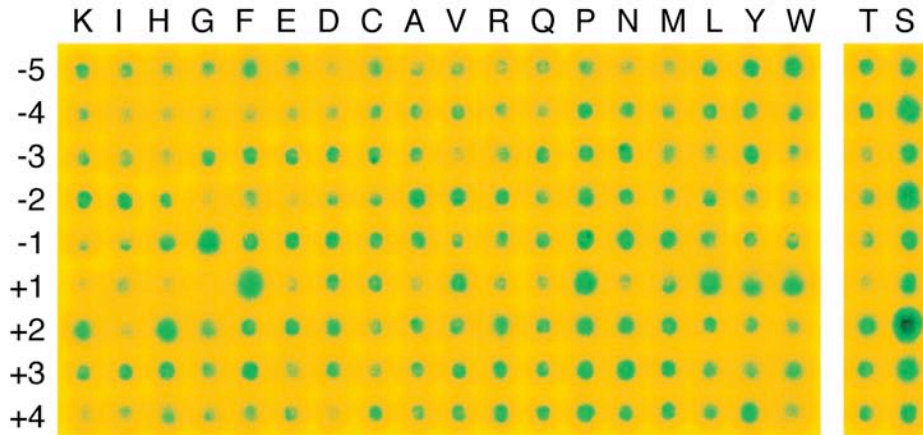

**Fig. S4.** In vitro phosphorylation of a PSPL with mTORC1 purified from HEK-293T cells stably expressing FLAG-raptor in the presence of Rheb and radiolabeled ATP. Each reaction consists of a mixture of biotinylated peptides containing one fixed residue relative to the central phospho-acceptor and other residues randomized. Aliquots of each reaction were spotted onto a streptavidin membrane and developed by PhosphorImaging. The scan was pseudo-colored to aid in visualization. The numbering of the positions is relative to the central phospho-acceptor serine or threonine.

# FIGURE S5

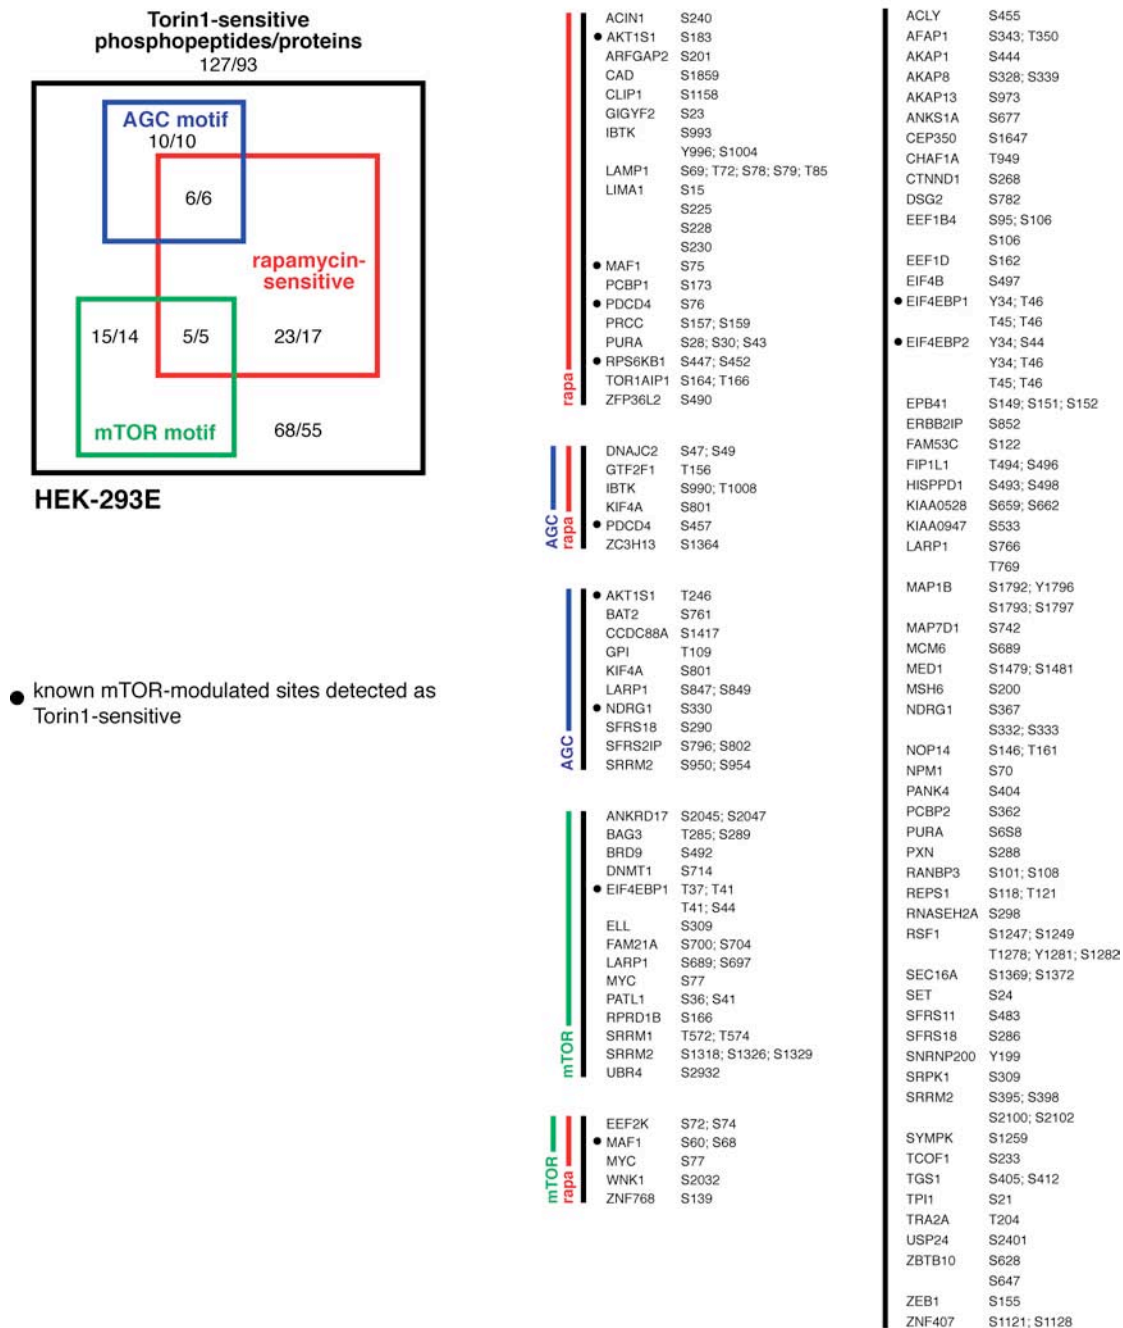

**Fig. S5.** Classification of the mTOR-regulated phosphopeptides in HEK-293E cells organized by rapamycin sensitivity ( $-2.5 \text{ MAD} (\log_2 (\text{Rapamycin/Insulin}))$ , consistency with the mTOR motif (5<sup>th</sup> percentile by Scansite) or presence of an AGC motif ((R/K)X(R/K)XX(S\*/T\*)). The numbers before the slash represent the number of unique phosphopeptides while the numbers after the slash represent the number of unique proteins represented by those phosphopeptides within each category. The phosphorylation sites present in the phosphopeptides and the known mTOR-modulated sites detected as Torin1-sensitive are indicated to the right.

# FIGURE S6

## Torin1-sensitive phosphopeptides/proteins 231/174

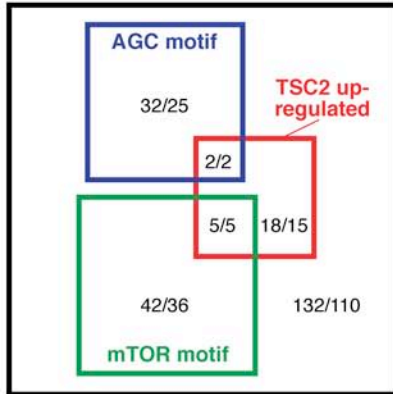

MEF

- known mTOR-modulated sites detected as Torin1-sensitive

|                                                                                                                                                                                                                                                                                                                                                                                                                                                 |                                                                                                                                                                                                                                                                                                                                                                                                                                                                                                                                                                                                                                                                                                                                                                                                                                                                                                                                                                                                                                                                                                                                                                            |                                                                                                                                                                                                                                                                                                                                                                                                                                                                                                                                                                                                                                                                                                                                                                                                                                                                                                                                                                                                                                                                                                                                                                                                                                                                                                                                                                                                                                                                                                                                                                                                                                                                                                                                                                                            |
|-------------------------------------------------------------------------------------------------------------------------------------------------------------------------------------------------------------------------------------------------------------------------------------------------------------------------------------------------------------------------------------------------------------------------------------------------|----------------------------------------------------------------------------------------------------------------------------------------------------------------------------------------------------------------------------------------------------------------------------------------------------------------------------------------------------------------------------------------------------------------------------------------------------------------------------------------------------------------------------------------------------------------------------------------------------------------------------------------------------------------------------------------------------------------------------------------------------------------------------------------------------------------------------------------------------------------------------------------------------------------------------------------------------------------------------------------------------------------------------------------------------------------------------------------------------------------------------------------------------------------------------|--------------------------------------------------------------------------------------------------------------------------------------------------------------------------------------------------------------------------------------------------------------------------------------------------------------------------------------------------------------------------------------------------------------------------------------------------------------------------------------------------------------------------------------------------------------------------------------------------------------------------------------------------------------------------------------------------------------------------------------------------------------------------------------------------------------------------------------------------------------------------------------------------------------------------------------------------------------------------------------------------------------------------------------------------------------------------------------------------------------------------------------------------------------------------------------------------------------------------------------------------------------------------------------------------------------------------------------------------------------------------------------------------------------------------------------------------------------------------------------------------------------------------------------------------------------------------------------------------------------------------------------------------------------------------------------------------------------------------------------------------------------------------------------------|
| <ul style="list-style-type: none"> <li>EIF4EBP1 T44; T45</li> <li>EPB4.1L3 T584</li> <li>GORASP1 T363; S365; S367</li> <li>ITSN1 T890</li> <li>MAP4K4 S691</li> <li>MCF2L T583</li> <li>OSBP S188; S191</li> <li>PHLDB2 T358</li> <li>S359</li> <li>T546</li> <li>S551</li> <li>RPS6KC1 S697; S708</li> <li>SLK S643; S647</li> <li>SMCR8 S413</li> <li>SMTNL2 S339</li> <li>SNX18 S20</li> <li>TMEM135 S221</li> <li>TNKS1BP1 S1437</li> </ul> | <ul style="list-style-type: none"> <li>AHNAK S5555; S5557</li> <li>AKT1S1 T247</li> <li>ATXN1 S751</li> <li>BAT2 S759; S761; S764</li> <li>BRWD1 S1782; S1784; S1789</li> <li>CARHSP1 S53</li> <li>EHMT2 S285</li> <li>EIF4B S174; S176</li> <li>FAM178A S318</li> <li>HDGFRP2 S450</li> <li>S450; S454</li> <li>LMNA S292</li> <li>100045983 S983</li> <li>LYSMD2 S33</li> <li>MDM2 S183</li> <li>MYCBP2 S3577</li> <li>NDRG1 T328; S330</li> <li>S330; S332</li> <li>S330; S332; S333</li> <li>S1468</li> <li>S4245</li> <li>POM121 S367</li> <li>RPS6 S236; S240</li> <li>SETD1A S1176</li> <li>SFRS18 S290</li> <li>SRPK2 S488; S490</li> <li>S488; S491</li> <li>TOPORS T859; S861; S863</li> <li>UTP18 T200; S201; S202; S206</li> </ul>                                                                                                                                                                                                                                                                                                                                                                                                                             | <ul style="list-style-type: none"> <li>HNRNPF S63</li> <li>HNRNPUL2 S166</li> <li>IBTK S994</li> <li>IL1RAP S566</li> <li>KIRREL S671; S674; S676</li> <li>KTN1 S90</li> <li>LARP1 S900; S902</li> <li>S1010; T1013</li> <li>S1108</li> <li>LARP4 S377</li> <li>S377; S379; S382</li> <li>LIG1 S922; S923</li> <li>LMO7 S1156</li> <li>LOC637796 S146; S151</li> <li>LRP12 T849</li> <li>MBIP S22</li> <li>MCM2 T25; S26; S27</li> <li>MCM6 S699</li> <li>MDC1 S168; S176</li> <li>MRE11A S686</li> <li>MYADM S22</li> <li>NES S963</li> <li>T1130</li> <li>S1860; S1861</li> <li>NRADD S226</li> <li>NUMA1 S1973</li> <li>NUP133 S40</li> <li>OLFR244 Y184; T186; T189; S190</li> <li>OXR1 T115</li> <li>PDCD11 S1470</li> <li>PEX5L S441</li> <li>PLEKHG3 S1123; S1129</li> <li>PPAN T233</li> <li>PPIG S252; S254; S255; S257</li> <li>PTPN13 S1506</li> <li>PUM2 S82</li> <li>SCAP S850</li> <li>SFRS2IP S498; S502</li> <li>SLC22A14 T346; S358</li> <li>SLC4A7 S89</li> <li>SLK S348</li> <li>SNTB2 S208; S211</li> <li>SRRM2 S971; S972</li> <li>S1243; S1247</li> <li>S1244; S1247</li> <li>T1478; S1481</li> <li>S1956</li> <li>S2548; S2550; S2552</li> <li>SSRP1 S667</li> <li>SSX2IP S313</li> <li>STEAP3 S20</li> <li>STX7 S129</li> <li>SUPT6H T1532</li> <li>TBC1D5 S561</li> <li>TCF12 S582</li> <li>TCF20 S1397</li> <li>TCFAP4 S121</li> <li>TCFE3 S413</li> <li>TMPO S384</li> <li>TNS3 S686</li> <li>TOMM20 S135</li> <li>TPD52L2 S96</li> <li>TRIM28 S596</li> <li>TRIM47 S504</li> <li>TRIM68 S388</li> <li>TRIP10 S296; S299</li> <li>UBE4B S88</li> <li>UBXN7 S367</li> <li>UHRF2 S668</li> <li>ULK1 S638</li> <li>WDR33 S1204</li> <li>WDR44 T351</li> <li>WIBG S138</li> <li>ZEB1 S681</li> <li>T680</li> <li>ZFP36L1 S334</li> <li>ZFP509 S282; S288</li> </ul> |
| <ul style="list-style-type: none"> <li>NDRG1 S330</li> <li>REEP1 S152</li> </ul>                                                                                                                                                                                                                                                                                                                                                                | <ul style="list-style-type: none"> <li>4922501C03. S451</li> <li>ACIN1 S387; S389</li> <li>ADARB1 T686</li> <li>AFAP1 S684</li> <li>AKAP12 S1645</li> <li>AKT1S1 S184</li> <li>S204; S213</li> <li>ALAD S215</li> <li>ALS2 S486</li> <li>AMIGO3 S257</li> <li>ANKRD11 S1829</li> <li>ANXA2 S127</li> <li>ATN1 S77</li> <li>ATP2B2 S1185</li> <li>ATXN2L S304</li> <li>AW146020 S118</li> <li>BRE S222</li> <li>CCDC12 S165</li> <li>CCNL1 S341; S344</li> <li>S344; S347</li> <li>CEBPB S183</li> <li>CHD8 S2213</li> <li>CNPY2 S115</li> <li>CSNK1G3 S367</li> <li>CTPS S575</li> <li>CXCR7 S350</li> <li>DGCR8 S377</li> <li>DLK1 S357</li> <li>DTL S654</li> <li>EDC3 S131</li> <li>EIF4EBP1 Y33; T45</li> <li>S34; T49</li> <li>S34; T35; T49</li> <li>Y34; T46</li> <li>T45; T46</li> <li>EIF5B S184; S187</li> <li>EP400 T885; S886</li> <li>EPS8 S810; S814</li> <li>F11R S288</li> <li>FAM117B T12</li> <li>FIP1L1 S447</li> <li>FNIP1 S306</li> <li>FOSL1 S267</li> <li>FOXK1 S222; S225; S243</li> <li>S225; S229; T231</li> <li>S243</li> <li>GM5780 S534; S536</li> <li>GRB10 S99</li> <li>GTF2F1 S385</li> <li>HGS S310</li> <li>HIRIP3 S207; S208</li> </ul> | <ul style="list-style-type: none"> <li>2810004N23. T53; S67</li> <li>AFAP1 S665; S669</li> <li>S666; S669</li> <li>AHNAK S5525; S5536</li> <li>S5553; T5571</li> <li>AKAP11 S987</li> <li>T1092</li> <li>ATXN2L T31; S32</li> <li>BC059842 S3116</li> <li>CDC42BPB S1692</li> <li>CHFR S231</li> <li>DDX18 T101</li> <li>DLG5 S1209</li> <li>DPYSL3 S522</li> <li>EHMT2 S287</li> <li>EIF4EBP2 T37; T41</li> <li>EIF4G1 T212</li> <li>FLNA S1338</li> <li>FOXK1 S431</li> <li>S427; S431</li> <li>FOXK2 S547</li> <li>IRS2 S616</li> <li>JUN T242; S246</li> <li>LARP1 S1010; S1018</li> <li>MCL1 T144</li> <li>MTAP1B S1247; S1260</li> <li>NES S919</li> <li>NFRKB S351</li> <li>NUMA1 S1973; T1982</li> <li>S1974; T1982</li> <li>NUP188 T1515</li> <li>PATL1 T194</li> <li>PHLDB1 S1007; S1009</li> <li>POLR2A S1882</li> <li>PTPN13 S1073; S1077</li> <li>RC3H1 S535</li> <li>ST5 S30; S32; S42</li> <li>TAF3 S229</li> <li>TBC1D10B S382; S386; S389</li> <li>TOPORS S1016</li> <li>WIPI2 S395</li> </ul>                                                                                                                                                                                                                                                                                                                                                                                                                                                                                                                                                                                                                                                                                                                                                                            |
| <ul style="list-style-type: none"> <li>ARHGAP29 S1040</li> <li>CUX1 S793</li> <li>GRB10 S103; S104</li> <li>PHLDB2 S17</li> <li>SMCR8 S416</li> </ul>                                                                                                                                                                                                                                                                                           |                                                                                                                                                                                                                                                                                                                                                                                                                                                                                                                                                                                                                                                                                                                                                                                                                                                                                                                                                                                                                                                                                                                                                                            |                                                                                                                                                                                                                                                                                                                                                                                                                                                                                                                                                                                                                                                                                                                                                                                                                                                                                                                                                                                                                                                                                                                                                                                                                                                                                                                                                                                                                                                                                                                                                                                                                                                                                                                                                                                            |

**Fig. S6.** Classification of the mTOR-regulated phosphopeptides in MEFs organized by upregulation in the absence of TSC2 ( $+2.5 \text{ MAD } \log_2(\text{TSC2}^{-/-} \text{ vehicle}/\text{TSC2}^{+/+} \text{ vehicle})$ ), consistency with the mTOR motif (5<sup>th</sup> percentile by Scansite) or presence of an AGC motif ((R/K)X(R/K)XX(S\*/T\*)). The numbers before the slash represent the number of unique phosphopeptides while the numbers after the slash represent the number of unique proteins represented by those phosphopeptides within each category. The phosphorylation sites present in the phosphopeptides and the known mTOR-modulated sites detected as Torin1-sensitive are indicated to the right.



## FIGURE S7

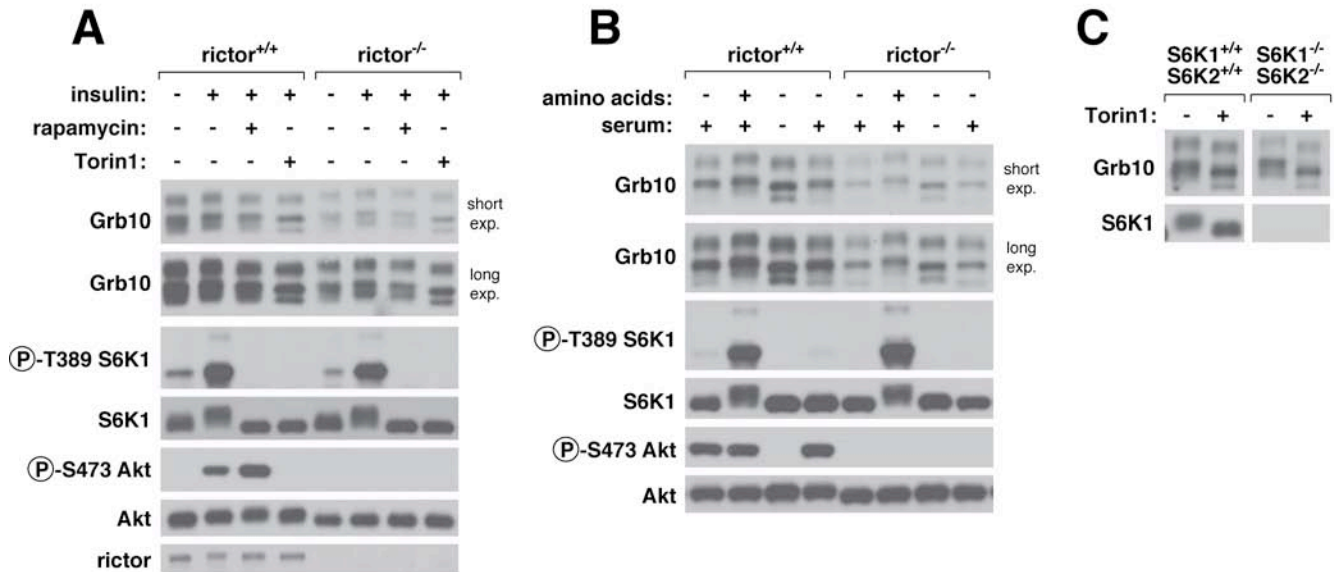

**Fig. S7.** mTORC2 and S6K are not required for Grb10 phosphorylation. (A) rictor<sup>+/+</sup> and rictor<sup>-/-</sup> MEFs were serum starved for 4 hours, treated with either 100 nM rapamycin, 250 nM Torin1, or vehicle control for 1 hr, and then stimulated where indicated with 150 nM insulin for 15 min. Cell lysates were analyzed by immunoblotting. (B) rictor<sup>+/+</sup> and rictor<sup>-/-</sup> MEFs were deprived of amino acids or both amino acids and serum for 50 min, and then stimulated with either amino acids or serum for 10 min where indicated and analyzed by immunoblotting. (C) S6K1<sup>-/-</sup> S6K2<sup>-/-</sup> or control cells were treated with 250 nM Torin1 or vehicle control for 1 hr and analyzed by immunoblotting.

## FIGURE S8

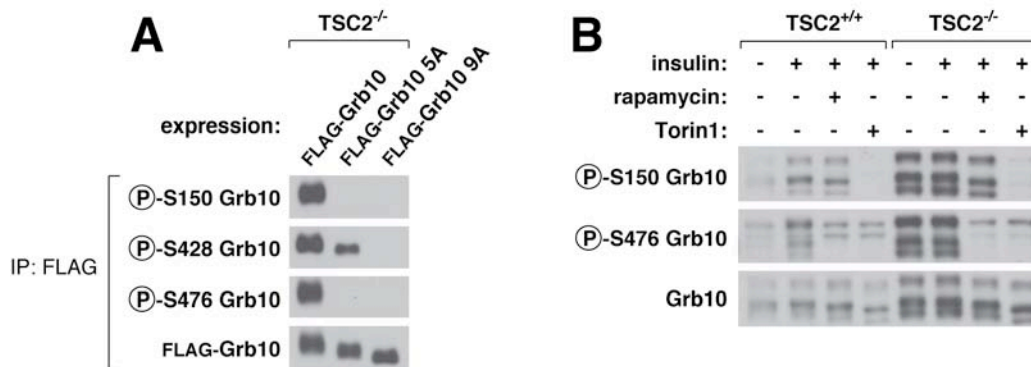

**Fig. S8.** Validation of phospho-specific antibodies against S150, S428, and S476 Grb10. (A) FLAG-immunoprecipitates from TSC2<sup>-/-</sup> MEFs stably expressing FLAG-Grb10, 5A (S150A T155A S158A S474A S476A), or 9A (5A + S104A S426A S428A S431A) were analyzed by immunoblotting. (B) TSC2<sup>+/+</sup> and TSC2<sup>-/-</sup> MEFs were deprived of serum for 4 hrs, treated with 100 nM rapamycin, 250 nM Torin1, or vehicle control for 1 hr, and then stimulated where indicated with 150 nM insulin for 15 min. Cell lysates were analyzed by immunoblotting.

## FIGURE S9

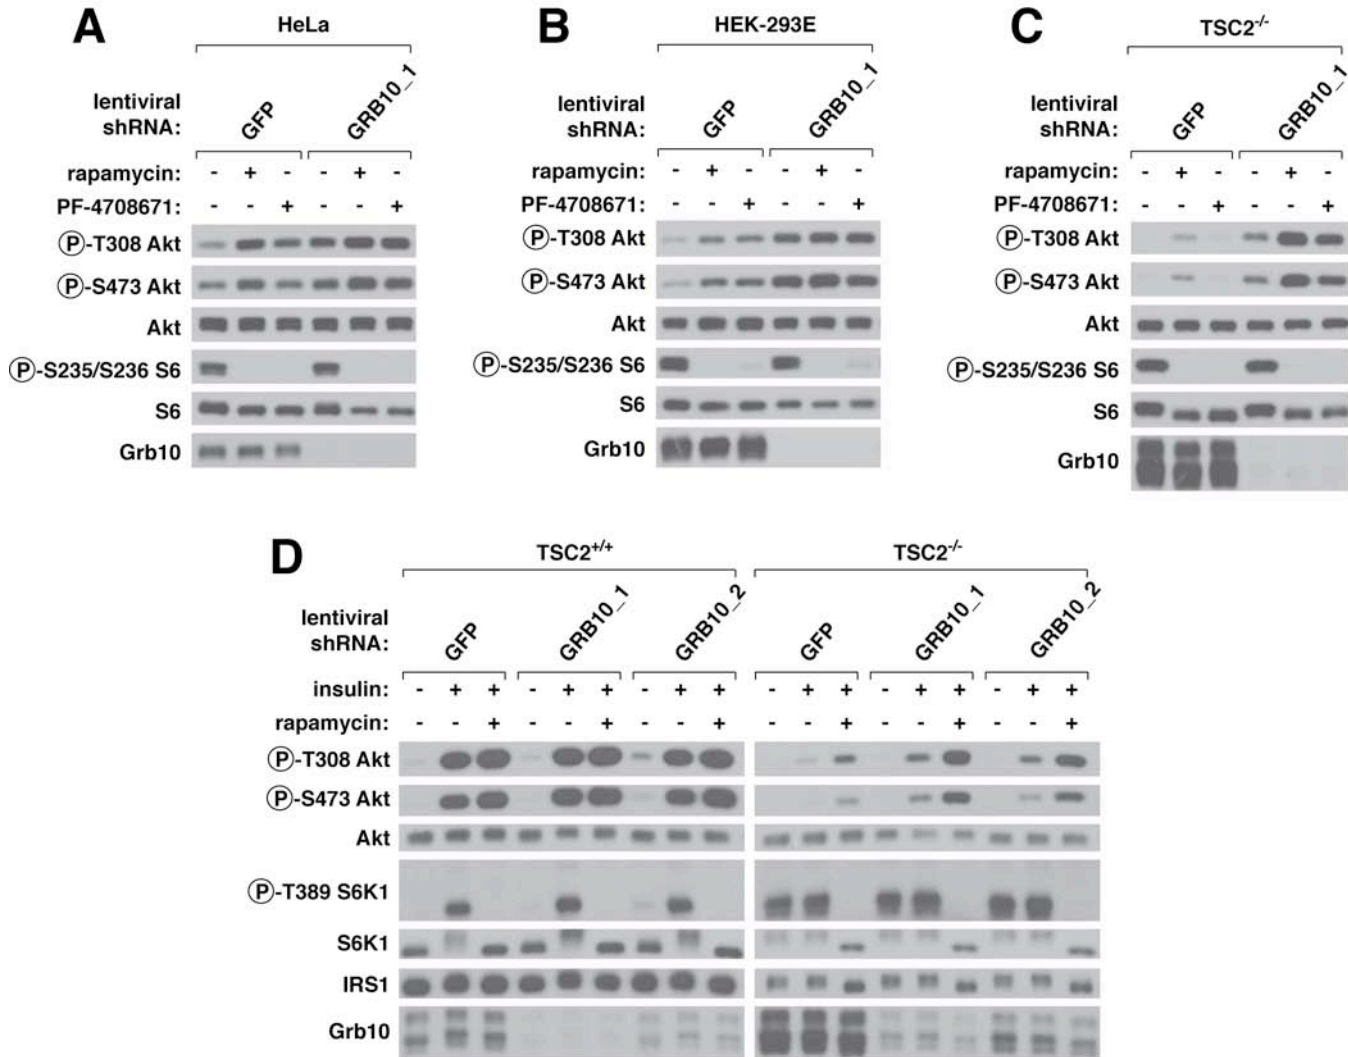

**Fig. S9.** The effects of Grb10 suppression and S6K inhibition are additive. (A) HeLa and (B) HEK-293E cells expressing shRNAs against GFP or human Grb10 were treated for 100 nM rapamycin, 10  $\mu$ M PF-4708671 (an S6K inhibitor), or vehicle control for 1 hr, and lysates were analyzed by immunoblotting. (C) TSC2<sup>-/-</sup> MEFs expressing shRNAs against GFP or mouse Grb10 were starved for 1 hr in the presence of either 100 nM rapamycin, 10  $\mu$ M PF-4708671, or vehicle control, and then all samples were stimulated with 100 nM insulin for 15 min and analyzed by immunoblotting. (D) TSC2<sup>+/+</sup> and TSC2<sup>-/-</sup> MEFs expressing shRNAs against GFP or mouse Grb10 were starved for 4 hrs, treated with rapamycin or vehicle control for 1 hr, and then stimulated with 100 nM insulin where indicated for 15 min and analyzed by immunoblotting.

# FIGURE S10

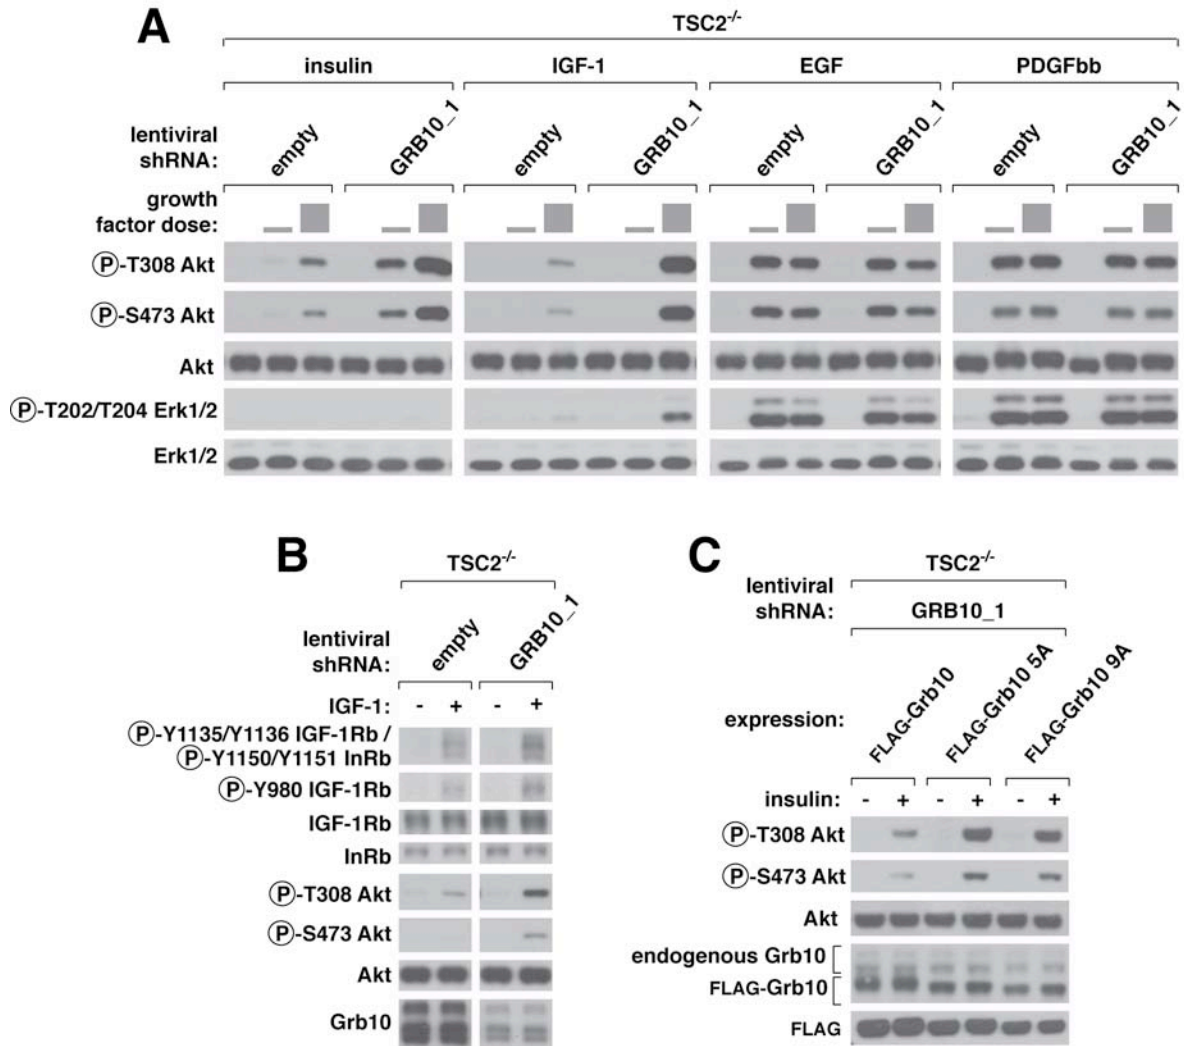

**Fig. S10.** Suppression of Grb10 restores the insulin and IGF-1 sensitivity of TSC2<sup>-/-</sup> cells and phosphorylation is important for Grb10 function. (A) TSC2<sup>-/-</sup> MEFs expressing either an empty vector or shRNA against Grb10 were starved for 4 hrs, stimulated where indicated with 10 or 100 nM insulin, 10 or 100 ng/ml IGF-1, 10 or 100 ng/ml EGF, or 10 or 100 ng/ml PDGFbb for 15 minutes, and analyzed by immunoblotting. (B) TSC2<sup>-/-</sup> MEFs expressing shRNAs against GFP or mouse Grb10 were serum starved for 4 hrs and then stimulated where indicated with 100 ng/ml IGF-1 for 15 min and analyzed by immunoblotting. (C) TSC2<sup>-/-</sup> MEFs coexpressing an shRNA targeted against the mouse Grb10 3'UTR and a FLAG-Grb10 (human), 5A (S150A T155A S158A S474A S476A) or 9A (5A + S104A S426A S428A S431A) cDNA expression construct were starved for 4 hrs and then stimulated with 100 nM insulin for 15 min where indicated and analyzed by immunoblotting.

## FIGURE S11

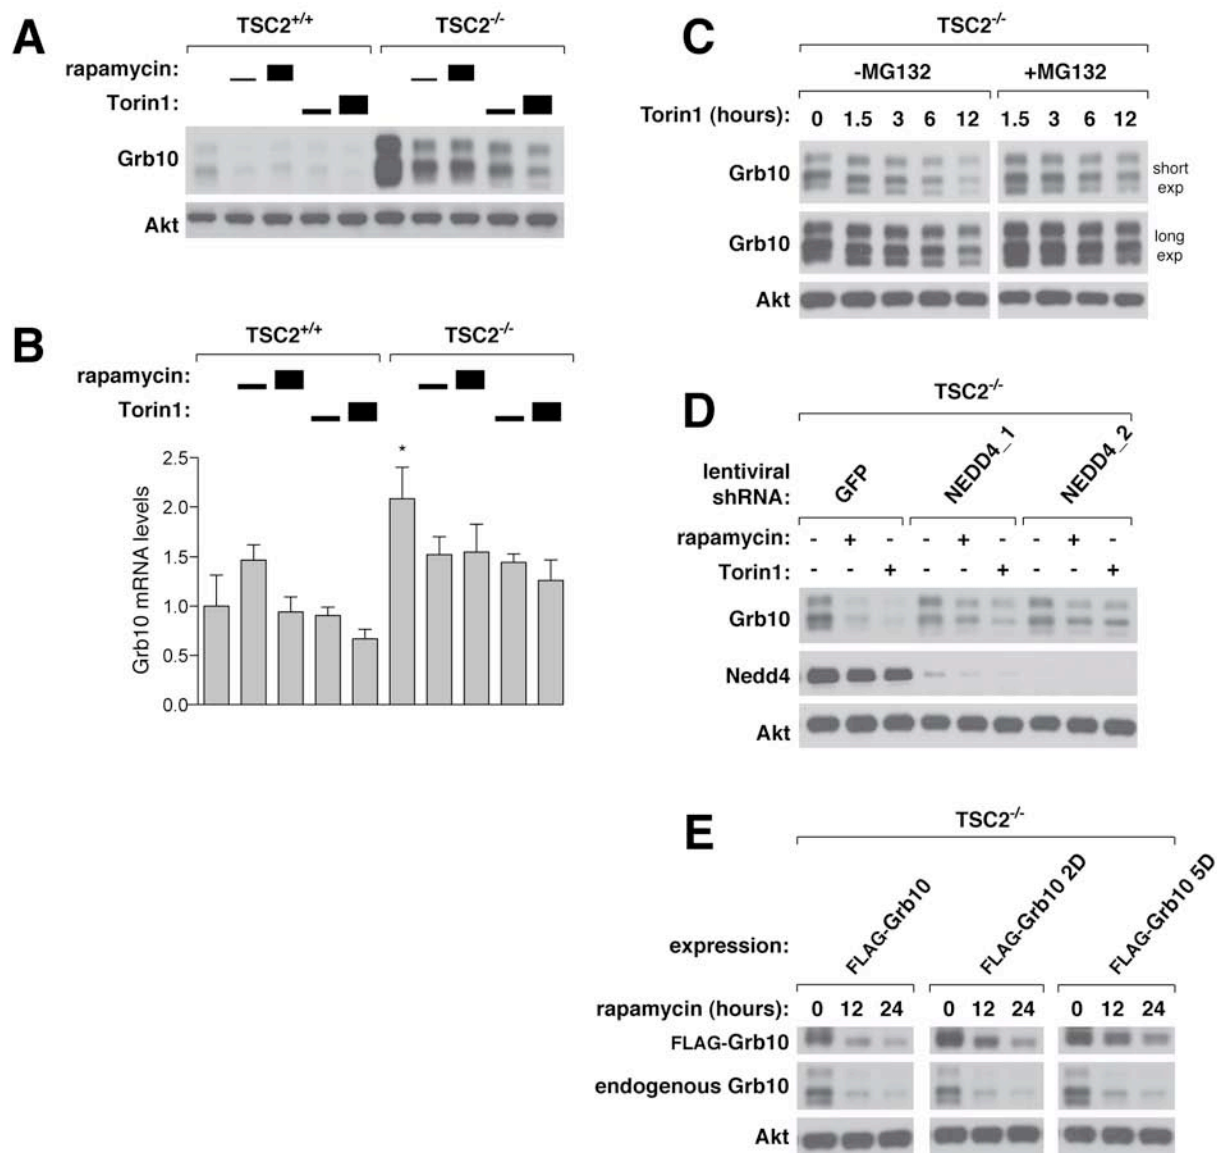

**Fig. S11.** mTORC1 phosphorylation regulates Grb10 stability. (A) Abundance of Grb10 in TSC2<sup>+/+</sup> and TSC2<sup>-/-</sup> MEFs treated with 10 or 100 nM rapamycin, Torin1, or vehicle control for 24 hrs. Cells were lysed and analyzed by immunoblotting. (B) RNA was isolated from TSC2<sup>+/+</sup> and TSC2<sup>-/-</sup> MEFs treated as in (A). Grb10 mRNA was measured by qRT-PCR and normalized to the level of Rplp0 mRNA. Data are means  $\pm$  s.e.m. (n=7); \*Mann-Whitney t-test p-value < 0.05 for differences between vehicle treated TSC2<sup>+/+</sup> and TSC2<sup>-/-</sup> MEFs. Other comparisons are not significant. (C) Abundance of Grb10 in TSC2<sup>-/-</sup> MEFs treated with 100nM Torin1 or vehicle control for the indicated number of hrs in the absence or presence of 10  $\mu$ M MG132. Cells were lysed and analyzed by immunoblotting. (D) Abundance of Grb10 in TSC2<sup>-/-</sup> MEFs expressing shRNAs against GFP or mouse Nedd4 and treated with 100 nM rapamycin, Torin1, or vehicle control for 24 hrs. Cells were lysed and analyzed by immunoblotting. (E) Abundance of

endogenous Grb10 or exogenous FLAG-Grb10 in TSC2<sup>-/-</sup> stably expressing FLAG-Grb10, 2D (S474D S476 D), or 5D (S150D T155D S158D S474D S476D) mutants treated with 20 nM rapamycin or vehicle control for the indicated lengths of time. Cells were lysed and analyzed by immunoblotting.

## FIGURE S12

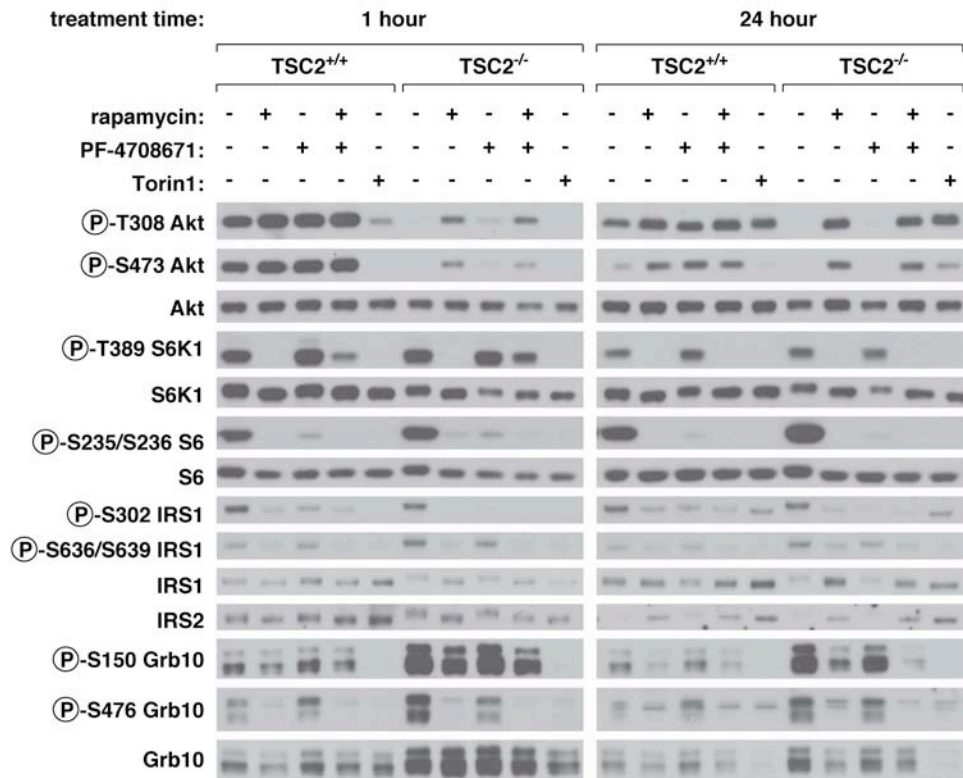

**Fig. S12.** mTORC1 acutely regulates the phosphorylation and chronically regulates the stability of Grb10 and IRS proteins. TSC2<sup>+/+</sup> and TSC2<sup>-/-</sup> MEFs expressing shRNA constructs against GFP or Grb10 were starved for one or 24 hrs in the presence of 100 nM rapamycin, 10  $\mu$ M PF-4708671, 100 nM Torin1, or vehicle control as indicated, and then all samples were stimulated with 100 nM insulin for 15 min. Cells lysates were analyzed by immunoblotting.

## References for Supporting Online Material

- S1. C. C. Thoreen *et al.*, *J Biol Chem* **284**, 8023 (2009).
- S2. D. A. Guertin *et al.*, *Dev Cell* **11**, 859 (2006).
- S3. S. M. Ali, D. M. Sabatini, *J Biol Chem* **280**, 19445 (2005).
- S4. P. L. Ross *et al.*, *Mol Cell Proteomics* **3**, 1154 (2004).
- S5. S. B. Ficarro *et al.*, *Anal Chem* **81**, 4566 (2009).
- S6. M. Askenazi, J. R. Parikh, J. A. Marto, *Nat Methods* **6**, 240 (2009).
- S7. J. R. Parikh *et al.*, *BMC Bioinformatics* **10**, 364 (2009).
- S8. J. E. Stajich *et al.*, *Genome Res* **12**, 1611 (2002).
- S9. W. Huang da, B. T. Sherman, R. A. Lempicki, *Nat Protoc* **4**, 44 (2009).
- S10. W. Huang da, B. T. Sherman, R. A. Lempicki, *Nucleic Acids Res* **37**, 1 (2009).
- S11. C. K. Yip, K. Murata, T. Walz, D. M. Sabatini, S. A. Kang, *Mol Cell* **38**, 768.
- S12. Y. Sancak *et al.*, *Mol Cell* **25**, 903 (2007).
- S13. J. E. Hutti *et al.*, *Nat Methods* **1**, 27 (2004).
- S14. J. C. Obenauer, L. C. Cantley, M. B. Yaffe, *Nucleic Acids Res* **31**, 3635 (2003).
- S15. P. E. Burnett, R. K. Barrow, N. A. Cohen, S. H. Snyder, D. M. Sabatini, *Proc Natl Acad Sci U S A* **95**, 1432 (1998).
- S16. Y. Sancak *et al.*, *Cell* **141**, 290.
- S17. D. H. Kim *et al.*, *Cell* **110**, 163 (2002).
- S18. J. Moffat *et al.*, *Cell* **124**, 1283 (2006).
- S19. D. D. Sarbassov, D. A. Guertin, S. M. Ali, D. M. Sabatini, *Science* **307**, 1098 (2005).
